# Supplementary material for: S18 family of mitochondrial ribosomal proteins: evolutionary history and Gly132 polymorphism in colon carcinoma
Source: PubMed Central journal article supplement (PMC5342443; doi:10.18632/oncotarget.10957), 2016-07-30
Supplement: oncotarget-07-55649-s001.pdf [file oncotarget-07-55649-s001.pdf]

## S18 family of mitochondrial ribosomal proteins: evolutionary history and Gly132 polymorphism in colon carcinoma

### SUPPLEMENTARY FIGURES AND TABLES

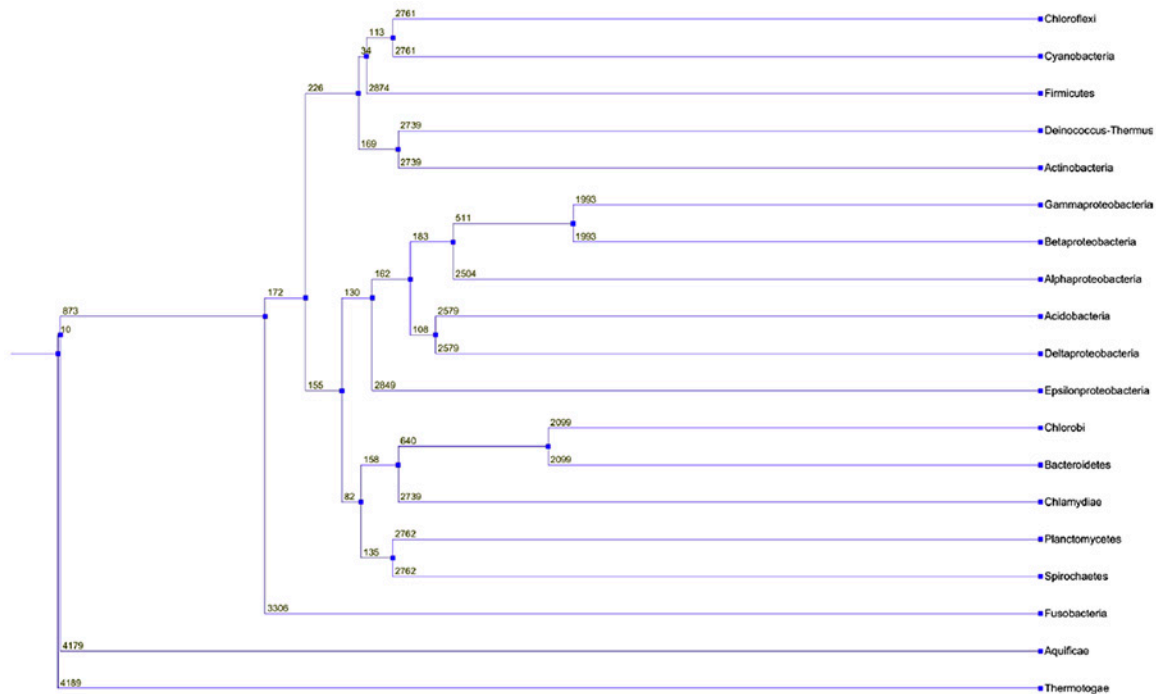

**Supplementary Figure S1: Bacterial species tree as a cladogram, consisting of bacterial species and divergence time on branches.** Following is the Newick string of the bacterial taxonomic tree we have employed in this study for JPrIme-DLRS. It was determined, using NCBI Taxonomy database for tree taxonomy and from TimeTree to infer divergence times. (((((((Chloroflexi: 2761, Cyanobacteria: 2761): 113, Firmicutes: 2874): 34, (Deinococcus Thermus: 2739, Actinobacteria: 2739): 169): 226, (((((Gamma proteobacteria: 1993, Beta proteobacteria: 1993): 511, Alpha proteobacteria: 2504): 183, (Acidobacteria: 2579, Delta proteobacteria: 2579): 108): 162, Epsilon proteobacteria: 2849): 130, (((Chlorobi: 2099, Bacteroidetes: 2099): 640, Chlamydiae: 2739): 158, (Planctomycetes: 2762, Spirochaetes: 2762): 135): 82): 155): 172, Fusobacteria: 3306): 873, Aquificae: 4179): 10, Thermotogae: 4189): 1000.

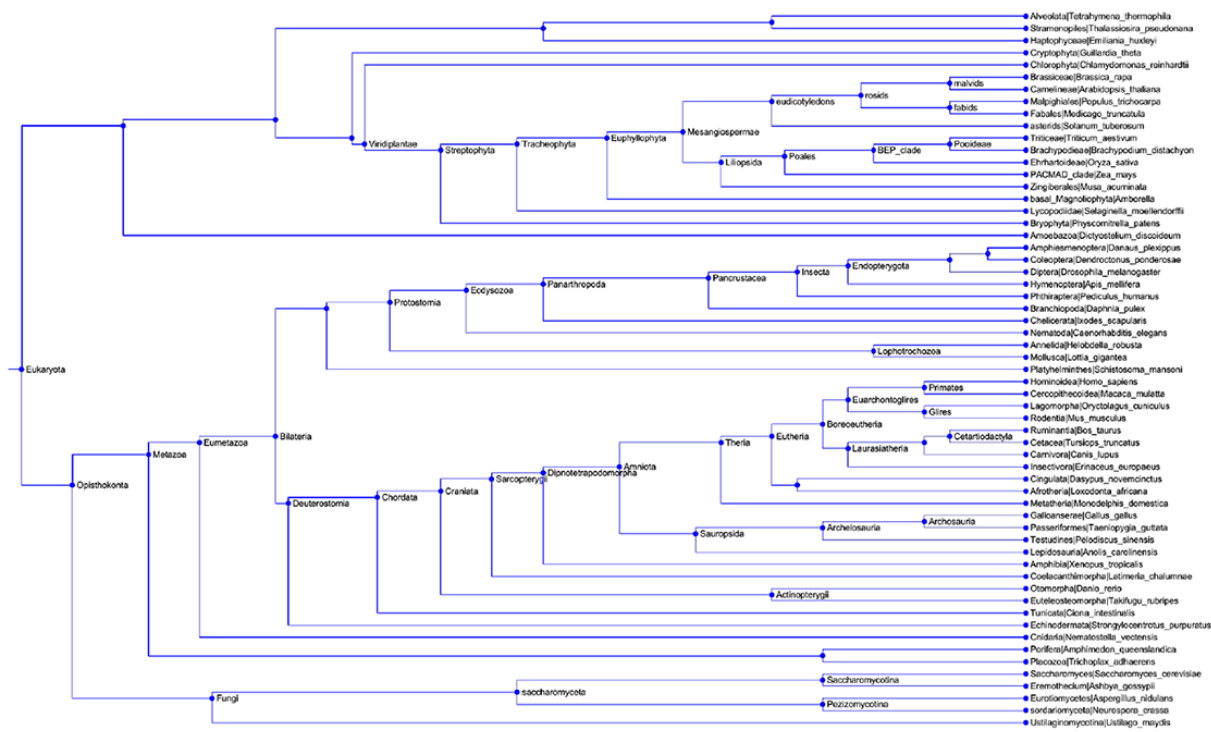

**Supplementary Figure S2: Eukaryotic species tree as a cladogram, consisting of eukaryotic species and taxonomic clade names on branches.** The leaf names indicate the taxonomic class of leaf and the species name, in which S18 proteins were found.

Following is the Newick string of the eukaryotic species tree we have employed in this study for JPrIME-DLRS. The topology for most of the species in this tree have been taken from Parfrey et. al and the rest from TimeTree.org and NCBI Taxonomy database. ((Dictyostelium discoideum: 1773.15413620058, (((Tetrahymena thermophila: 1469.642457632497, Thalassiosira pseudonana: 1469.642457632497): 76.2460363750481, Emiliana huxleyi: 1545.8884940075475): 80.15423791873536, (Guillardia theta: 1338.2692704438693, (Chlamydomonas reinhardtii: 936.3041909585723, (Selaginella moellendorffii: 593.4, (Physcomitrella patens: 433.07, (Amborella: 150.1, ((Musa acuminata: 116.0, (Oryza sativa: 34.1, (Zea mays: 31.6, (Triticum aestivum: 24.0, Brachypodium distachyon: 24.0): 7.6) : 2.5): 81.9): 31.8, (Solanum tuberosum: 125.0, ((Populus trichocarpa: 98.0, Medicago truncatula: 98.0): 11.0, (Brassica rapa: 16.4, Arabidopsis thaliana: 16.4): 92.6): 16.0): 22.8): 2.3): 282.97): 160.33): 342.9041909585723): 401.965079485297): 287.77346148241213): 147.11140427429223): 7.937535486708384, ((Ustilago maydis: 771.7234420252413, ((Aspergillus nidulans: 402.0, Neurospora crassa: 402.0): 271.0, (Saccharomyces cerevisiae: 311.0, Ashbya gossypii: 311.0): 362.0): 98.7234420252413): 523.9881694689175, (Amphimedon queenslandica: 1237.0, (Trichoplax adhaerens: 1147.0, (Nematostella vectensis: 784.6400568398692, ((Schistosoma mansoni: 632.2351224058409, ((Ciona intestinalis: 600.0, Strongylocentrotus purpuratus: 600.0): 29.23512240584145, ((Helobdella robusta: 545.0, Lottia gigantea: 545.0): 65.0, (Caenorhabditis elegans: 555.1623337181048, (Ixodes scapularis: 535.0, (Daphnia pulex: 470.0, (Pediculus humanus: 355.0, (Apis mellifera: 310.7051708776171, (Drosophila melanogaster: 300.0, (Danio plexippus: 280.0, Dendroctonus ponderosae: 280.0): 20.0): 10.7051708776171): 44.2948291223829): 115.0): 65.0): 20.1623337181048): 54.8376662818952): 19.23512240584145): 2.999999999999945): 59.80443141904982, ((Danio rerio: 307.0, Takifugu rubripes: 307.0): 147.6, (Latimeria chalumnae: 430.0, (Xenopus tropicalis: 361.2, ((Anolis carolinensis: 274.9, (Pelodiscus sinensis: 230.7, (Gallus gallus: 95.2, Taeniopygia guttata: 95.2): 135.5): 44.2): 49.6, (Monodelphis domestica: 176.1, ((Dasypus novemcinctus: 103.3, Loxodonta africana: 103.3): 1.4, ((Erinaceus europaeus: 87.2, (Canis lupus: 84.6, (Bos taurus: 59.1, Tursiops truncatus: 59.1): 25.5): 2.6): 10.2, ((Oryctolagus cuniculus: 86.4, Mus musculus: 86.4): 4.6, (Homo sapiens: 29.6, Macaca mulatta: 29.6): 61.4): 6.4): 7.3): 71.4): 148.4): 36.7): 68.8): 24.6): 237.43955382489128): 92.60050301497768): 362.3599431601308): 90.0): 58.7116114941582): 485.380060193123): 1000.0.

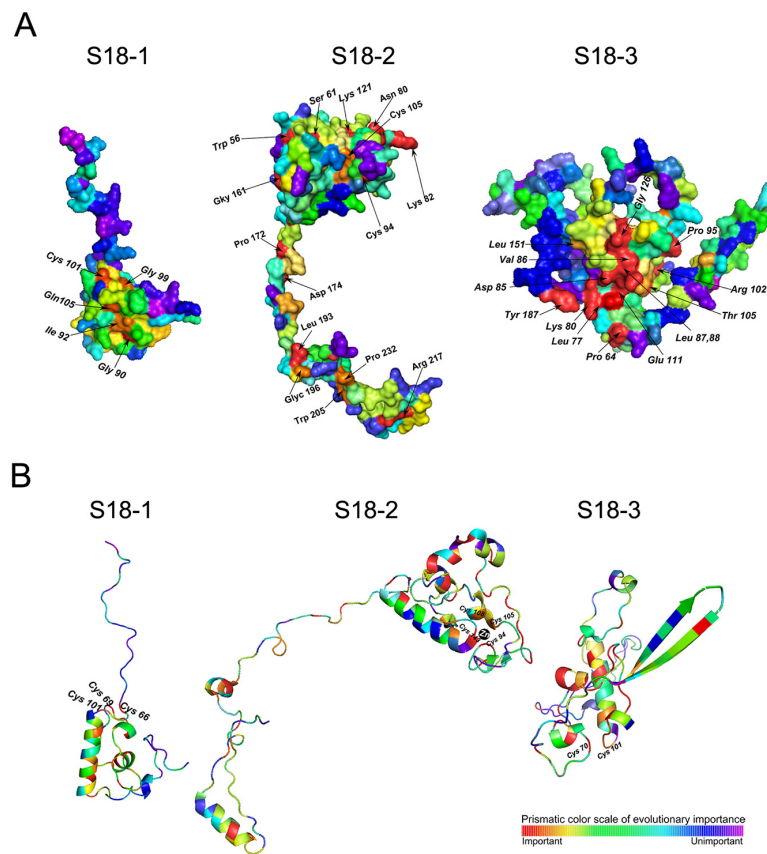

**Supplementary Figure S3: ETA structural analysis of S18 proteins.** Crystallographic structures were extracted from Greber B.J *et al.* 2015. **A.** Surface view of the structure of S18 family of proteins. Structures are colored as heat diagrams with red residues as evolutionarily conserved traces. **B.** Ribbon cartoons of the same structures, labeled amino acids are Cys residues of S18 proteins that are involved in the Zinc finger motif. The structures were developed using Pymol software.

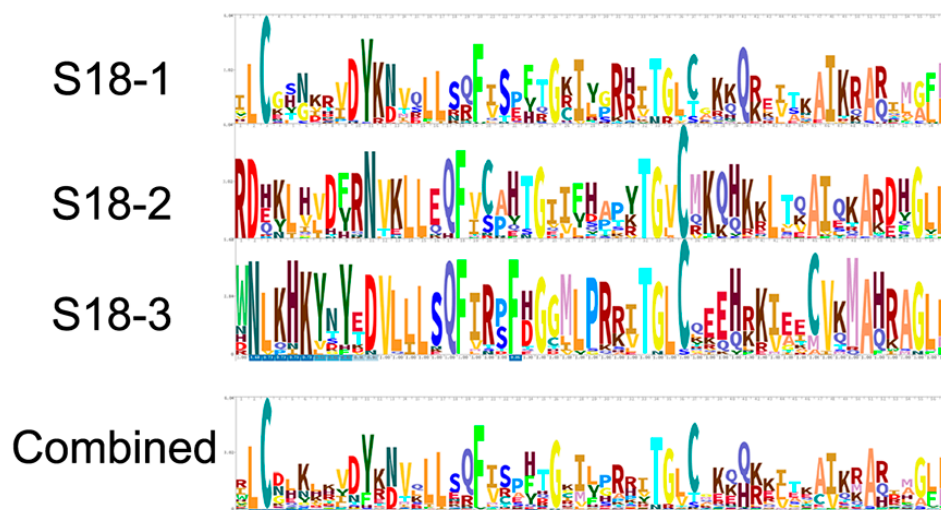

**Supplementary Figure S4: HMM logos for Ribosomal S18 domain of S18 proteins.** The Gly at the position (24) is the evolutionary conserved residue of combined HMM logos for the ribosomal S18 family of proteins.

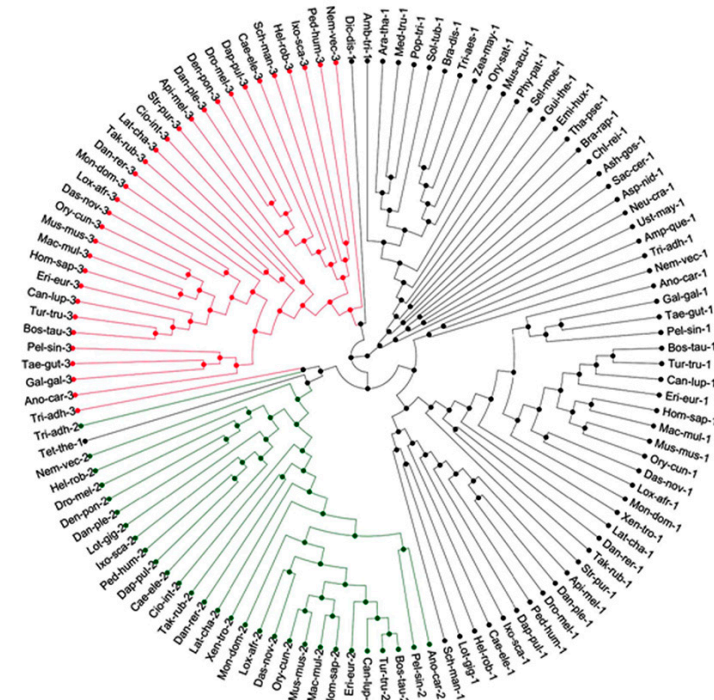

**Supplementary Figure S5: Maximum-A-Posteriori tree and tree at state with maximum likelihood.** A circular cladogram representation of the Maximum-A-Posteriori (MAP) tree, which is also the tree at the state with Maximum Likelihood in the posterior. We have color-coded this tree according to the scheme: Black → MRSP18-1, Green → MRSP18-2 and Red → MRSP18-3 to show that all proteins are grouping with their orthologs and that MRSP18-1 is more similar to MRSP18-2 than MRSP18-3.

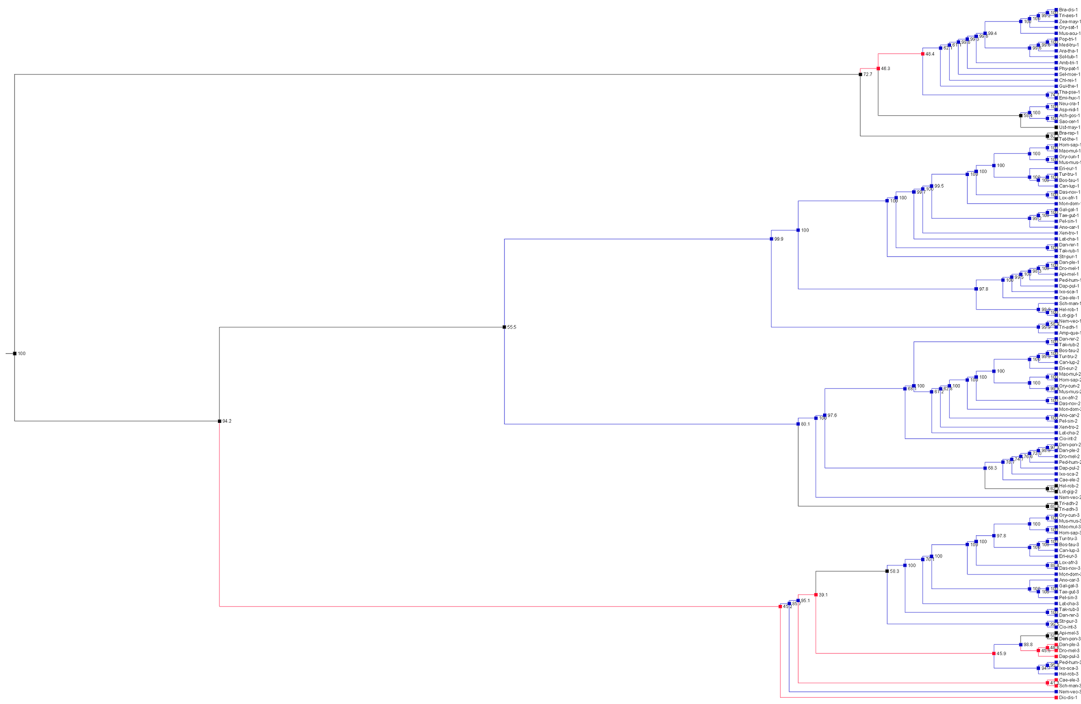

**Supplementary Figure S6: S18 eukaryotic consensus tree.** Except for a few splits close to root of species tree, the majority of splits are highly supported in tree posterior with posterior frequency greater than 80%.

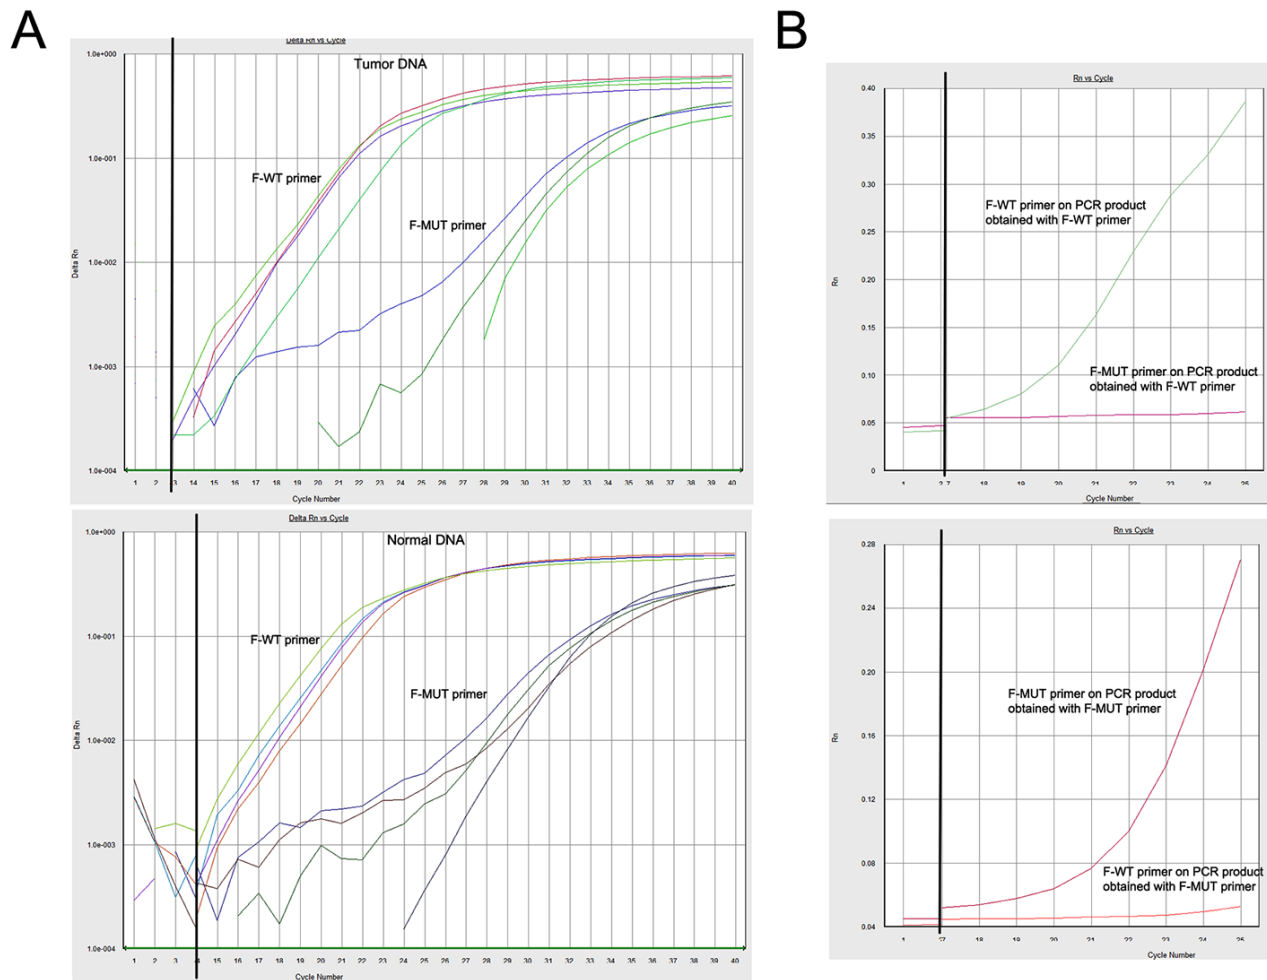

**Supplementary Figure S7: Q-PCR on tumor samples of colon adenocarcinoma and corresponding normal tissue.**

**A.** S18-2 genomic DNA was amplified with both, mutant (F-MUT) and wild type (F-WT) forward primers. PCR amplification on few samples of tumor DNA is shown on the top panel; amplification on DNA from corresponding normal tissue is shown on the bottom panel.

**B.** Re-amplification of two PCR products obtained by amplification of tumor DNA. The top panel – the first PCR product was obtained the wild type primer; the bottom panel – the first PCR product was amplified with the mutant primer.

**Supplementary Table S1: Bacterial S18 proteins. The table displays the taxonomic diversity and clades of bacteria that possess *S18* gene.**

| No | GI        | Accession ID | Representative Species                       | Bacterial Clade       |
|----|-----------|--------------|----------------------------------------------|-----------------------|
| 1  | 445990809 | WP_000068664 | <i>Firmicutes</i>                            | Firmicutes            |
| 2  | 488794038 | WP_002706444 | <i>Treponema saccharophilum</i>              | Spirochaetes          |
| 3  | 493797913 | WP_006745891 | <i>Thioalkalivibrio</i>                      | Gammaproteobacteria   |
| 4  | 495334257 | WP_008058994 | <i>Methyloversatilis</i>                     | Betaproteobacteria    |
| 5  | 501575308 | WP_012579695 | <i>Thermosipho africanus</i>                 | Thermotogae           |
| 6  | 501591037 | WP_012594993 | <i>Cyanothece</i>                            | Cyanobacteria         |
| 7  | 511068541 | WP_016310128 | <i>Enterorhabdus</i>                         | Actinobacteria        |
| 8  | 518820616 | WP_019976570 | <i>Empedobacter</i>                          | Bacteroidetes         |
| 9  | 548240343 | WP_022458510 | <i>Fusobacterium sp. CAG:439</i>             | Fusobacteria          |
| 10 | 551219330 | WP_022847268 | <i>Desulfurobacterium sp. TC5-1</i>          | Aquificae             |
| 11 | 652407344 | WP_026803084 | <i>Arcobacter</i>                            | Epsilonproteobacteria |
| 12 | 653296164 | WP_027481122 | <i>Deinococcus pimensis</i>                  | Deinococcus-Thermus   |
| 13 | 658545513 | WP_029738249 | <i>Chloroflexi bacterium JGI 0002000-F10</i> | Chloroflexi           |
| 14 | 737616672 | WP_035587240 | <i>Hippea jasoniae</i>                       | Deltaproteobacteria   |
| 15 | 737740036 | WP_035708741 | <i>Haematobacter</i>                         | Alphaproteobacteria   |
| 16 | 739339800 | WP_037202082 | <i>Rhodopirellula</i>                        | Planctomycetes        |
| 17 | 740204708 | WP_038046653 | <i>Thermoanaerobaculum aquaticum</i>         | Acidobacteria         |
| 18 | 752832630 | WP_041468932 | <i>Chloroherpeton thalassium</i>             | Chlorobi              |
| 19 | 754883876 | WP_042243026 | <i>Neochlamydia</i>                          | Chlamydiae            |

GI – the gene identification number; Accession ID – protein accession number

**Supplementary Table S2: Eukaryotic S18 proteins. The table displays the taxonomic diversity and clades that possess S18 genes.**

See Supplementary File 1

**Supplementary Table S3: The evolutionary trace analysis of human proteins S18-1, S18-2 and S18-3, based on the 3D structure**

| S18-1  | S18-2  | S18-3  |
|--------|--------|--------|
| Cys65  | Tyr58  | Cys70  |
| Cys68  | Pro72  | Pro71  |
| Lys75  | Arg78  | Lys80  |
| Lys76  | Arg79  | Asp85  |
| Leu79  | Asn80  | Val86  |
| Leu80  | Gly83  | Leu87  |
| Gln82  | Pro86  | Leu88  |
| Phe83  | Thr90  | Leu89  |
| Ser85  | Arg91  | Gln91  |
| Thr88  | Cys94  | Phe92  |
| Gly89  | Leu122 | Arg94  |
| Tyr92  | Leu123 | Gly97  |
| His95  | Gln125 | Leu100 |
| Ile96  | Phe126 | Pro101 |
| Thr97  | Thr131 | Arg102 |
| Gly98  | Gly132 | Thr105 |
| Leu99  | Thr140 | Gly106 |
| Cys100 | Gly141 | Leu107 |
| Gln104 | Cys143 | Cys108 |
| Ile111 | Gln146 | Glu111 |
| Met120 | Lys148 | Val119 |
| Lys125 | Leu150 | Met121 |
| Asp142 | Ala157 | Ala122 |
| Pro143 | Gly161 | Ala124 |
|        | Leu162 | Leu126 |
|        | Pro168 | Pro129 |
|        | Asp176 | Pro133 |
|        |        | Leu147 |

**Supplementary Table S4: Specific mutations in S18-1, S18-2, and S18-3 proteins in the different types of cancer and also in cancer cell lines. The data of the COSMIC database was analyzed. The G132 mutation in S18-2, which is widely present in colon carcinomas, is marked in bold.**

See Supplementary File 2

**Table S5. The samples of colon carcinoma, studied in the present work. All 30 samples were studied. Ten samples for those the PCR products, obtained with forward wild type and mutated primers, were sequenced are indicated in bold.**

See Supplementary File 3
